# Supplementary material
Source: PubMed Central journal article supplement (PMC6326900)
Supplement: NIHMS969482-supplement-supplement_1.pdf [file NIHMS969482-supplement-supplement_1.pdf]

## SUPPLEMENTARY MATERIAL

**Supplementary Figure 1: Leucine reduces brain kynurenine.** *A,B* Mean tryptophan and kynurenine in brains ( $\pm$  SEM) of mice treated with 50 mg/kg leucine or vehicle immediately before and 6 h after LPS or phosphate-buffered saline (PBS) (n = 5-7). *C,D* Mean tryptophan and kynurenine in plasma ( $\pm$  SEM) of mice treated with 50 mg/kg leucine or vehicle immediately before and 6 h after LPS or phosphate-buffered saline (PBS) (n = 5-7). \* $p \leq 0.05$ , \*\* $p \leq 0.01$  for LPS vs PBS main effects. ### $p \leq 0.01$ , #### $p \leq 0.0001$  for leucine vs vehicle main effects.

**Supplementary Figure 2: LPS induces sickness.** *A,B* Mean hourly body weight change (g/h) and food consumption (g/h) ( $\pm$  SEM) of mice treated with leucine or vehicle immediately before and 6 h after LPS or phosphate-buffered saline (PBS) (n  $\geq$  15 per group). *C,D* Mean quadrant entries and rears ( $\pm$  SEM) of mice treated with leucine or vehicle immediately before and 6 h after LPS or PBS (n  $\geq$  14 per group). \* $p \leq 0.05$ , for LPS vs PBS main effects. #### $p \leq 0.0001$  for leucine vs vehicle main effects. + $p \leq 0.05$  for leucine simple comparisons.

**Supplementary Figure 3: LPS increases hepatic inflammation and IDO activation.** Mean IL-1 $\beta$ , IL-6, TNF $\alpha$ , IL-10, and IDO mRNA levels (fold change of control at each time point) ( $\pm$  SEM) in livers of mice treated with leucine or vehicle and LPS or phosphate-buffered saline (PBS) at 6 and 27 h after LPS (n  $\geq$  5 per group). \* $p \leq 0.05$ , \*\* $p \leq 0.01$ , \*\*\* $p \leq 0.0001$  for LPS vs PBS comparisons. # $p \leq 0.05$  for leucine main effects.

**Supplementary Figure 4: LPS increases central inflammation and IDO activation.** Mean IL-1 $\beta$ , IL-6, TNF $\alpha$ , and IDO mRNA levels (fold change of control at each time point) ( $\pm$  SEM) in prefrontal cortices of mice treated with leucine or vehicle and LPS or phosphate-buffered saline (PBS) at 6 and 27 h after LPS ( $n \geq 5$  per group). \* $p \leq 0.05$ , \*\* $p \leq 0.01$ , \*\*\* $p \leq 0.0001$  for LPS vs PBS comparisons. # $p \leq 0.05$  for leucine main effects.

**Supplementary Figure 5: LPS increases hippocampal inflammation and induces IDO activation without interference by leucine.** Mean IL-1 $\beta$ , IL-6, Tnf $\alpha$ , and IL-10 mRNA levels (fold change of control) ( $\pm$  SEM) in the hippocampi of mice treated with leucine or vehicle immediately before and 6 h after LPS or phosphate-buffered saline (PBS) 27 h after LPS ( $n \geq 7$  per group). \*\* $p \leq 0.01$ , \*\*\* $p \leq 0.0001$  for LPS vs PBS comparisons.

**Supplementary Table 1: ANOVA statistics for all cytokine and IDO mRNA data in the liver, prefrontal cortex (PFC) and hippocampus at 6 and 27 h after LPS.** n.s. = not significant; n.d. = not detectable; n.m. = not measured.

**Supplementary Figure 6: LPS increases LAT1 mRNA.** Mean SCL3A2 and SLC7A5 mRNA levels (fold change of control) ( $\pm$  SEM) in prefrontal cortices of mice treated with leucine or vehicle and LPS or phosphate-buffered saline (PBS) at 6 h after LPS ( $n = 4-5$  per group).

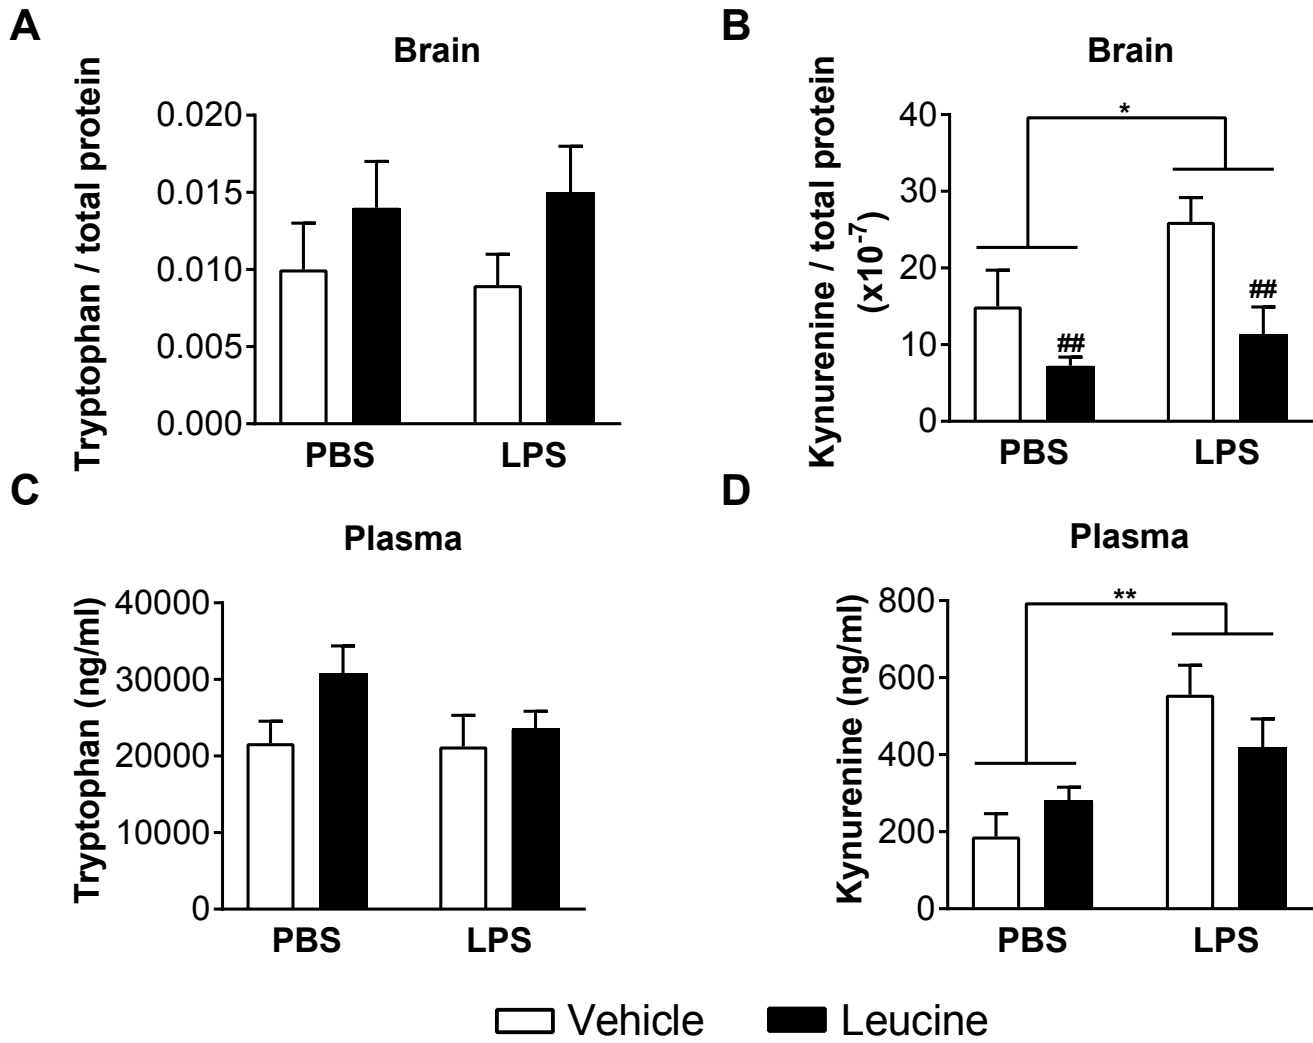

Supplementary Figure 1.

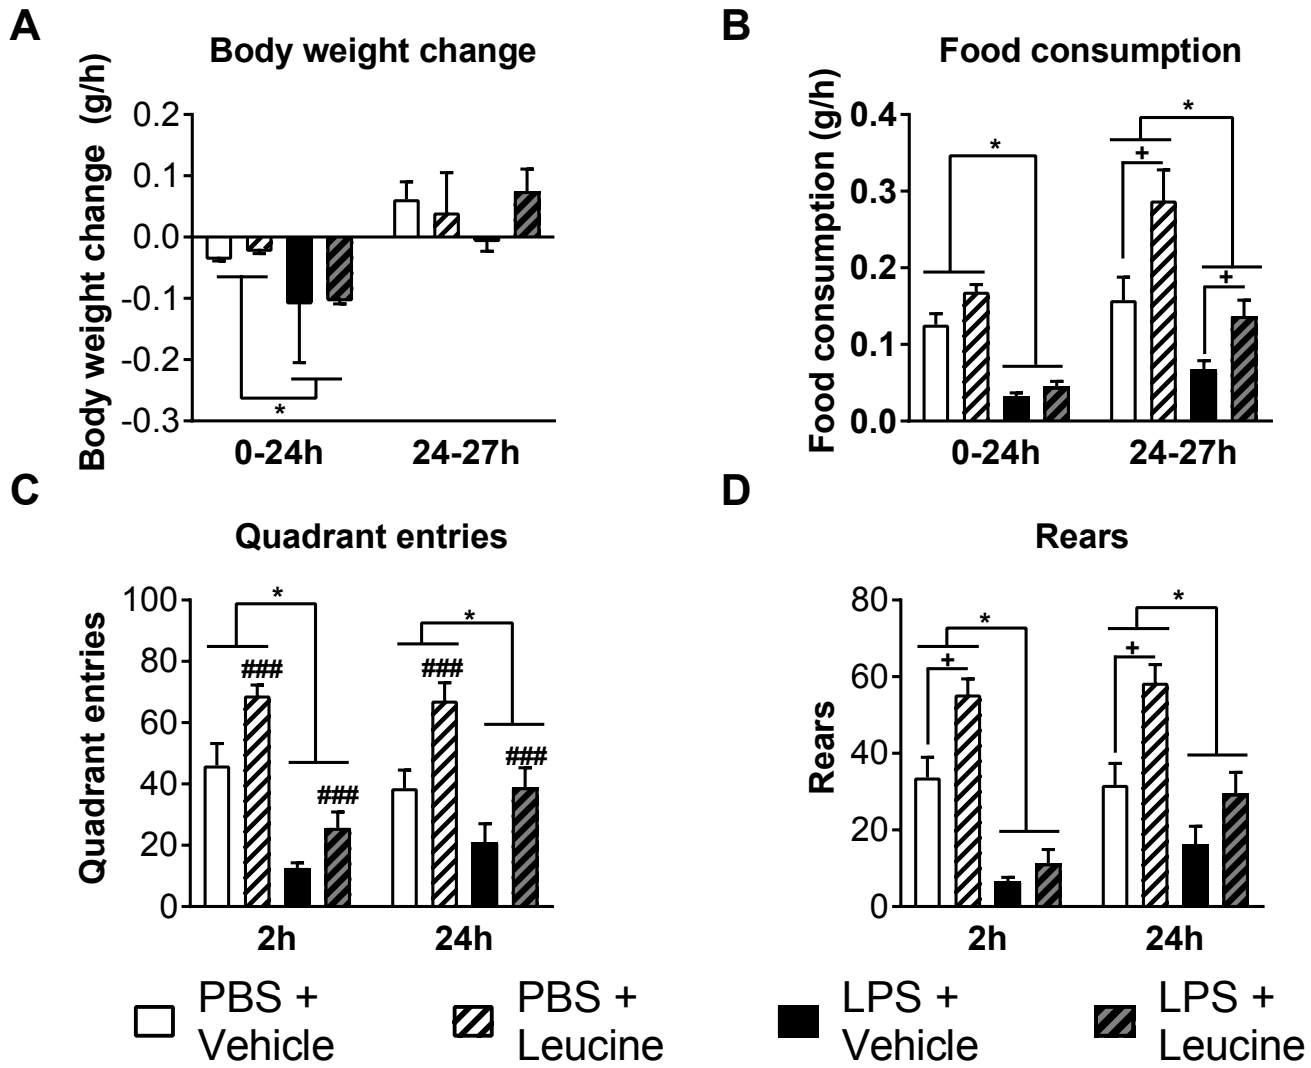

Supplementary Figure 2.

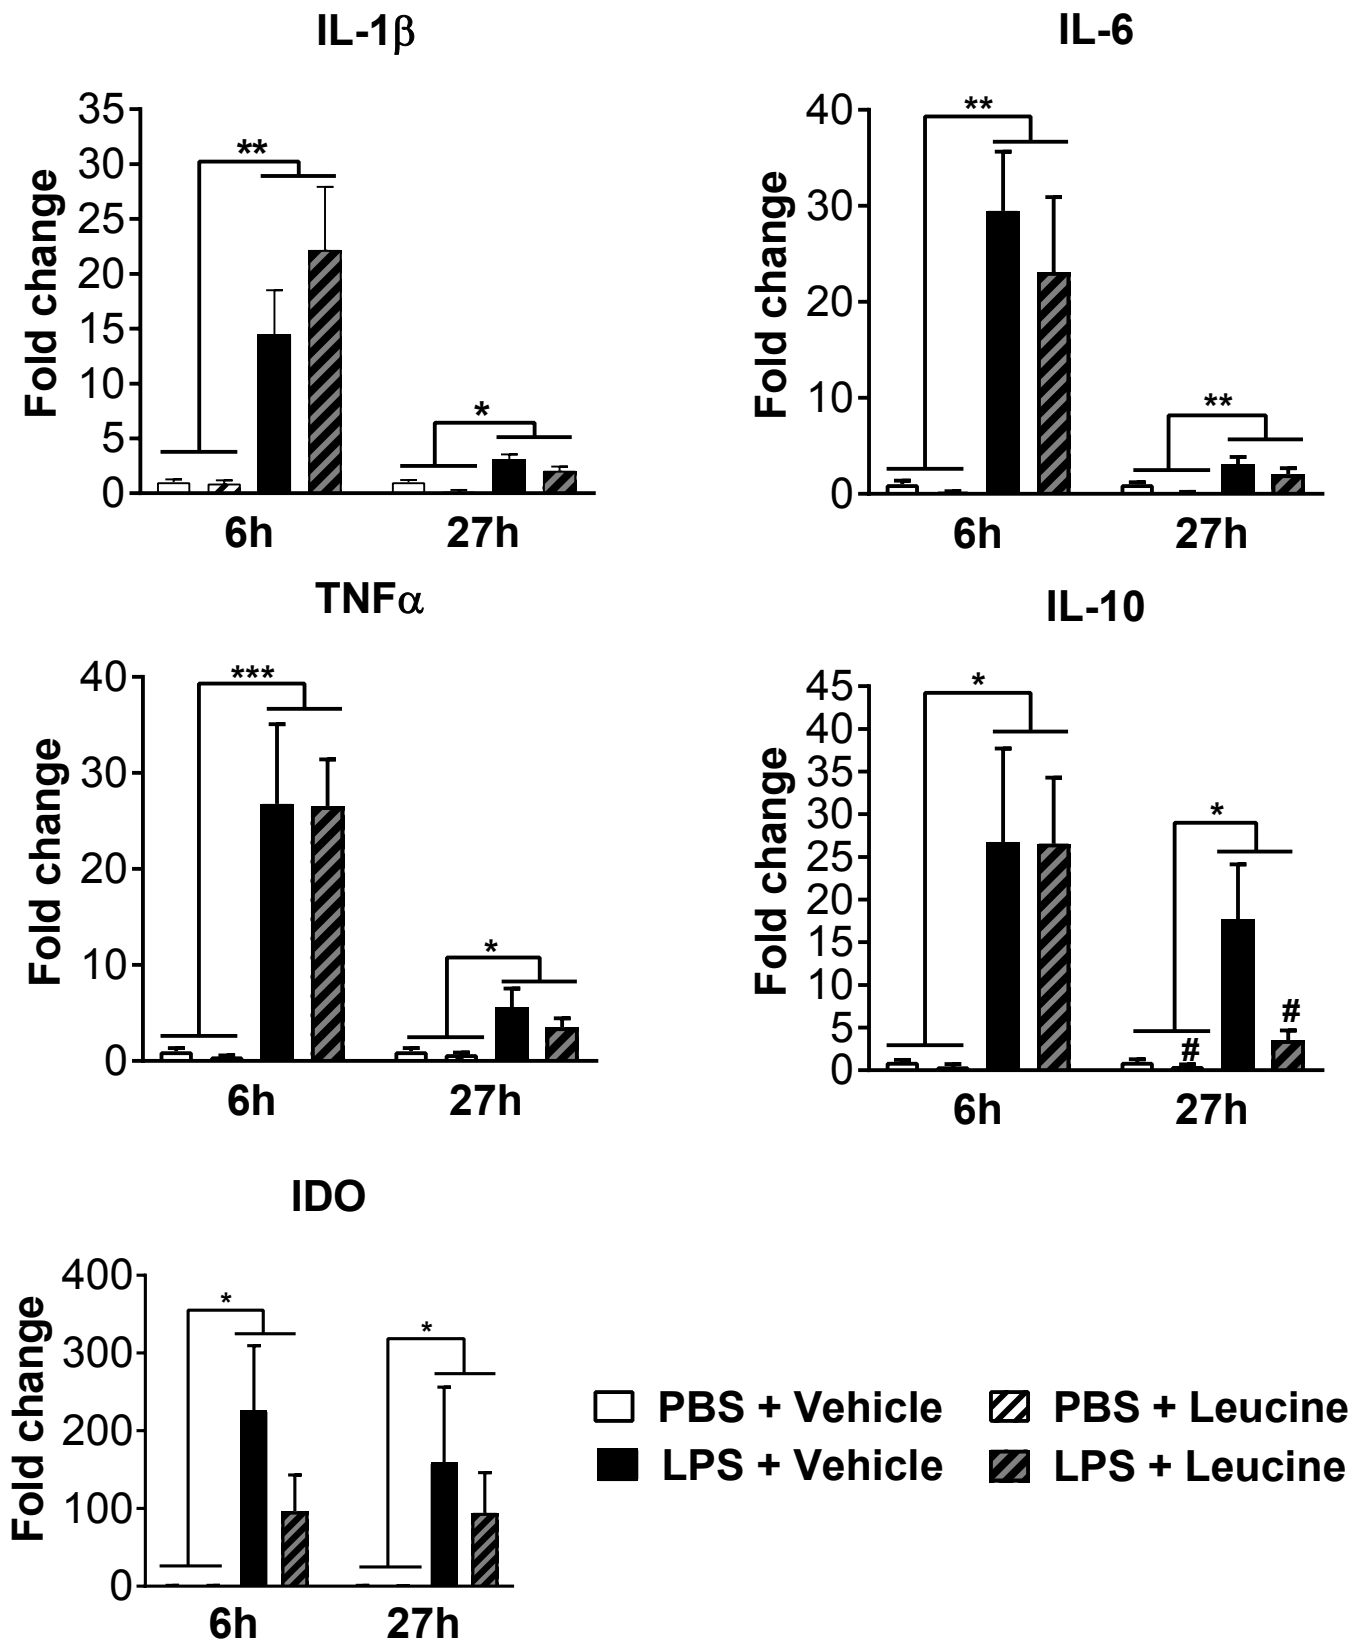

Supplementary Figure 3.

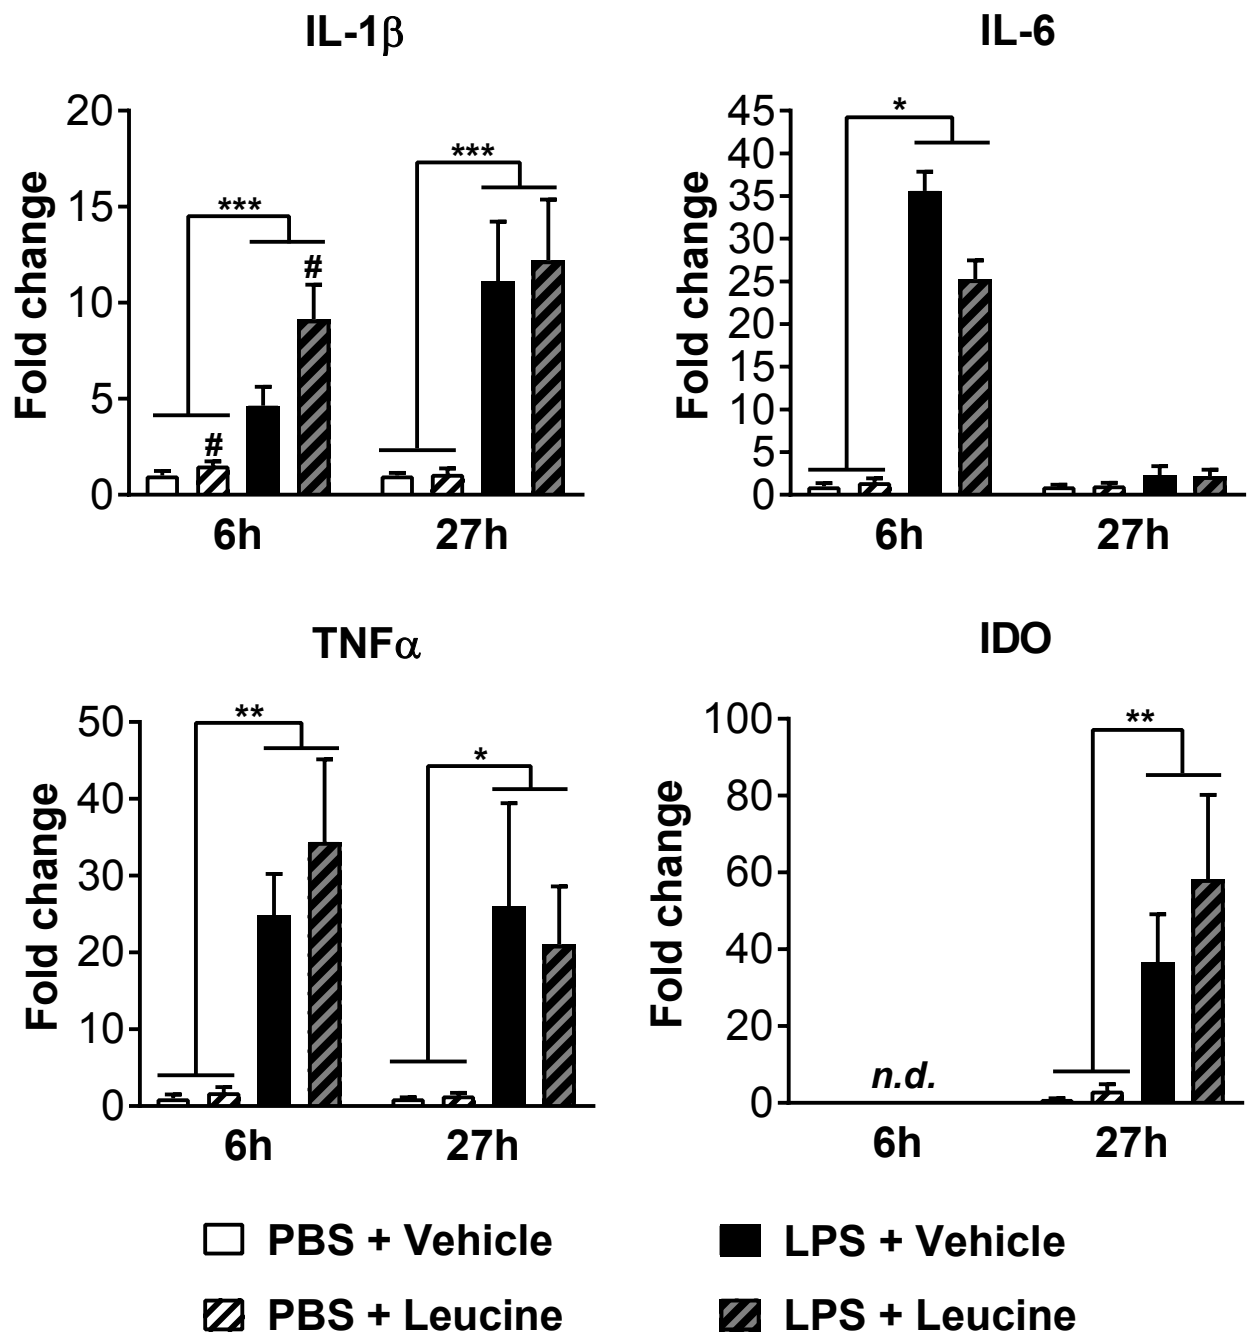

Supplementary Figure 4.

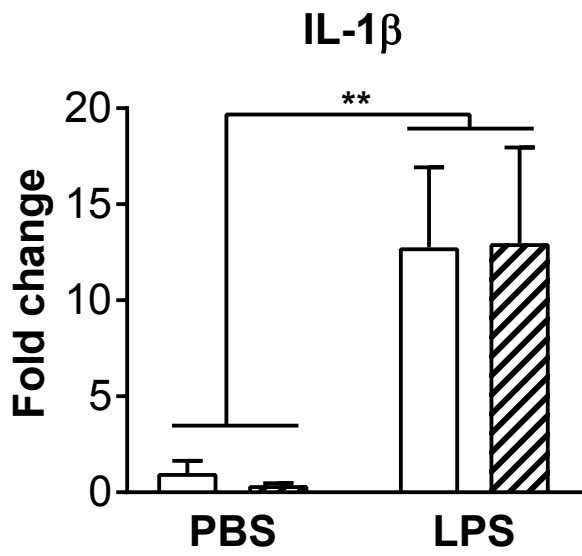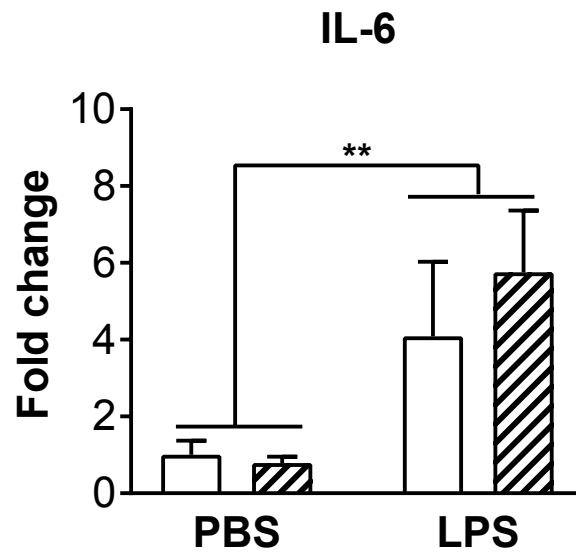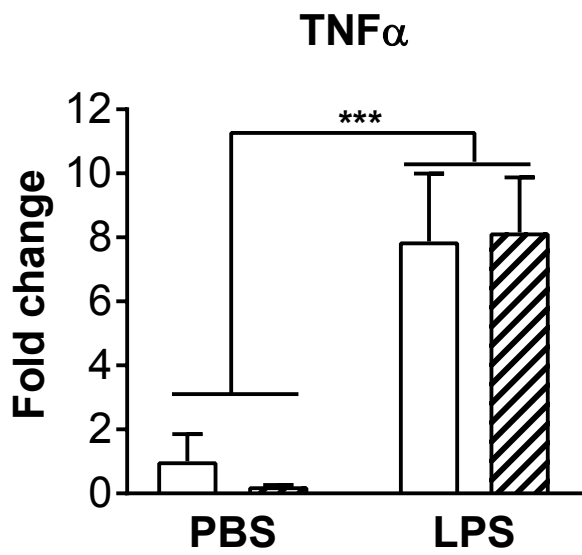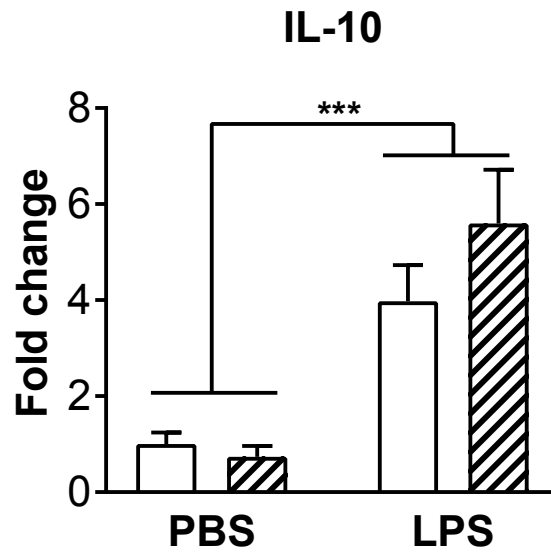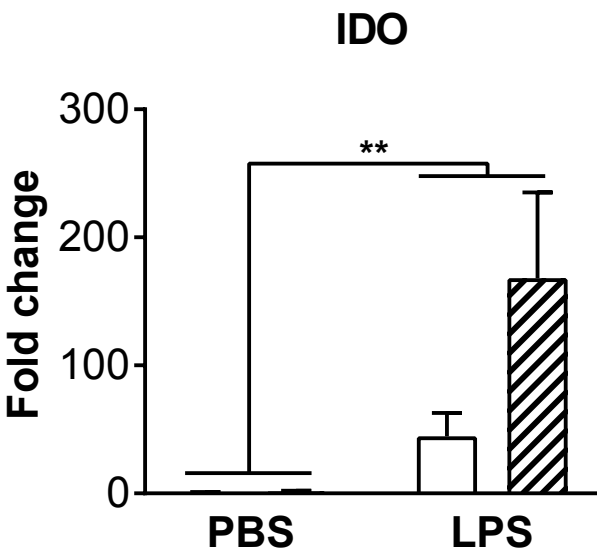

□ Vehicle ▨ Leucine

**Supplementary Table 1: Statistical information relating to cytokines assessed in the liver, prefrontal cortex and hippocampus.**

|                                           | Main Effect of LPS              |                                  | Main Effect of Leucine |                               | LPS x Leucine Interaction      |                               |
|-------------------------------------------|---------------------------------|----------------------------------|------------------------|-------------------------------|--------------------------------|-------------------------------|
|                                           | 6 h                             | 27 h                             | 6 h                    | 27 h                          | 6 h                            | 27 h                          |
| <b>Liver IL-6</b>                         | $F_{(1,21)} = 18.4, p < 0.01$   | $F_{(1,48)} = 16.19, p < 0.01$   | n.s                    | n.s                           | n.s                            | n.s                           |
| <b>Liver IL-1<math>\beta</math></b>       | $F_{(1,23)} = 18.5, p < 0.001$  | $F_{(1,49)} = 6.13, p < 0.05$    | n.s                    | n.s                           | n.s                            | n.s                           |
| <b>Liver TNF<math>\alpha</math></b>       | $F_{(1,23)} = 24.2, p < 0.0001$ | $F_{(1,48)} = 10.72, p < 0.01$   | n.s                    | n.s                           | n.s                            | n.s                           |
| <b>Liver IL-10</b>                        | See interaction column          | $F_{(1,27)} = 8.53, p < 0.01$    | n.s                    | $F_{(1,27)} = 8.53, p < 0.01$ | $F_{(1,20)} = 7.53, p < 0.001$ | $F_{(1,27)} = 8.53, p < 0.01$ |
| <b>Liver IDO</b>                          | $F_{(1,20)} = 8.93, p < 0.01$   | $F_{(1,50)} = 4.657, p < 0.05$   | n.s                    | n.s                           | n.s                            | n.s                           |
| <b>PFC IL-6</b>                           | $F_{(1,14)} = 9.69, p < 0.01$   | n.s.                             | n.s                    | n.s                           | n.s                            | n.s                           |
| <b>PFC IL-1<math>\beta</math></b>         | $F_{(1,15)} = 25.59, p = 0.01$  | $F_{(1,31)} = 18.91, p < 0.0001$ | n.s                    | n.s                           | n.s                            | n.s                           |
| <b>PFC TNF<math>\alpha</math></b>         | $F_{(1,15)} = 19.25, p < 0.01$  | $F_{(1,31)} = 6.48, p < 0.05$    | n.s                    | n.s                           | n.s                            | n.s                           |
| <b>PFC IL-10</b>                          | n.s.                            | $F_{(1,32)} = 6.88, p < 0.05$    | n.s                    | n.s                           | n.s                            | n.s                           |
| <b>PFC IDO</b>                            | n.d.                            | $F_{(1,30)} = 11.31, p < 0.01$   | n.s                    | n.s                           | n.s                            | n.s                           |
| <b>Hippocampus IL-6</b>                   | n.m                             | $F_{(1,31)} = 8.45, p < 0.01$    | n.s                    | n.s                           | n.s                            | n.s                           |
| <b>Hippocampus IL-1<math>\beta</math></b> | n.m.                            | $F_{(1,29)} = 10.81, p < 0.01$   | n.s                    | n.s                           | n.s                            | n.s                           |
| <b>Hippocampus TNF<math>\alpha</math></b> | n.m.                            | $F_{(1,31)} = 23.32, p < 0.0001$ | n.s                    | n.s                           | n.s                            | n.s                           |
| <b>Hippocampus IL-10</b>                  | n.m.                            | $F_{(1,28)} = 26.91, p < 0.0001$ | n.s                    | n.s                           | n.s                            | n.s                           |
| <b>Hippocampus IDO</b>                    | n.m.                            | $(F_{(1,31)} = 6.396, p < 0.01$  | n.s                    | n.s                           | n.s                            | n.s                           |



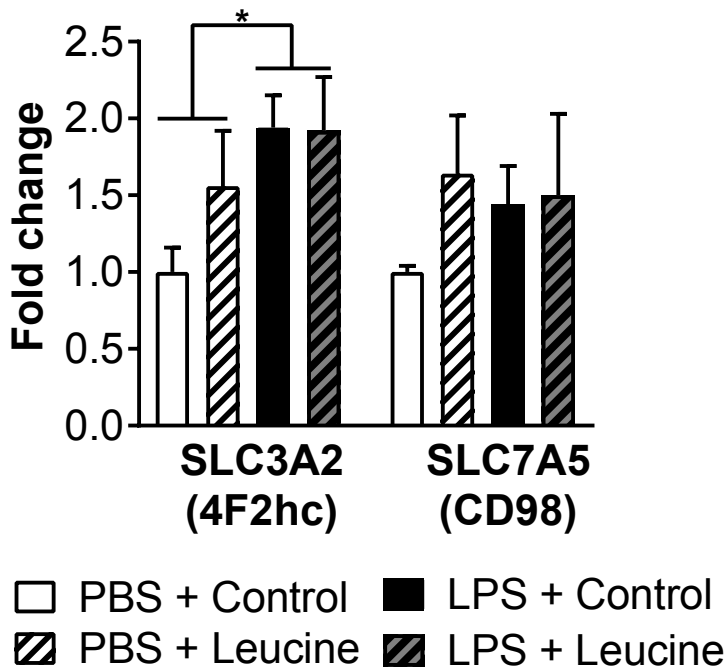

**Supplementary Figure 6.**
